# Supplementary material for: Insights on the Biomarker Potential of Exosomal Non-Coding RNAs in Colorectal Cancer: An In Silico Characterization of Related Exosomal lncRNA/circRNA–miRNA–Target Axis
Source: MDPI journal article supplement (doi:10.3390/cells12071081), 2023-04-04
Supplement: s1 [file s1]

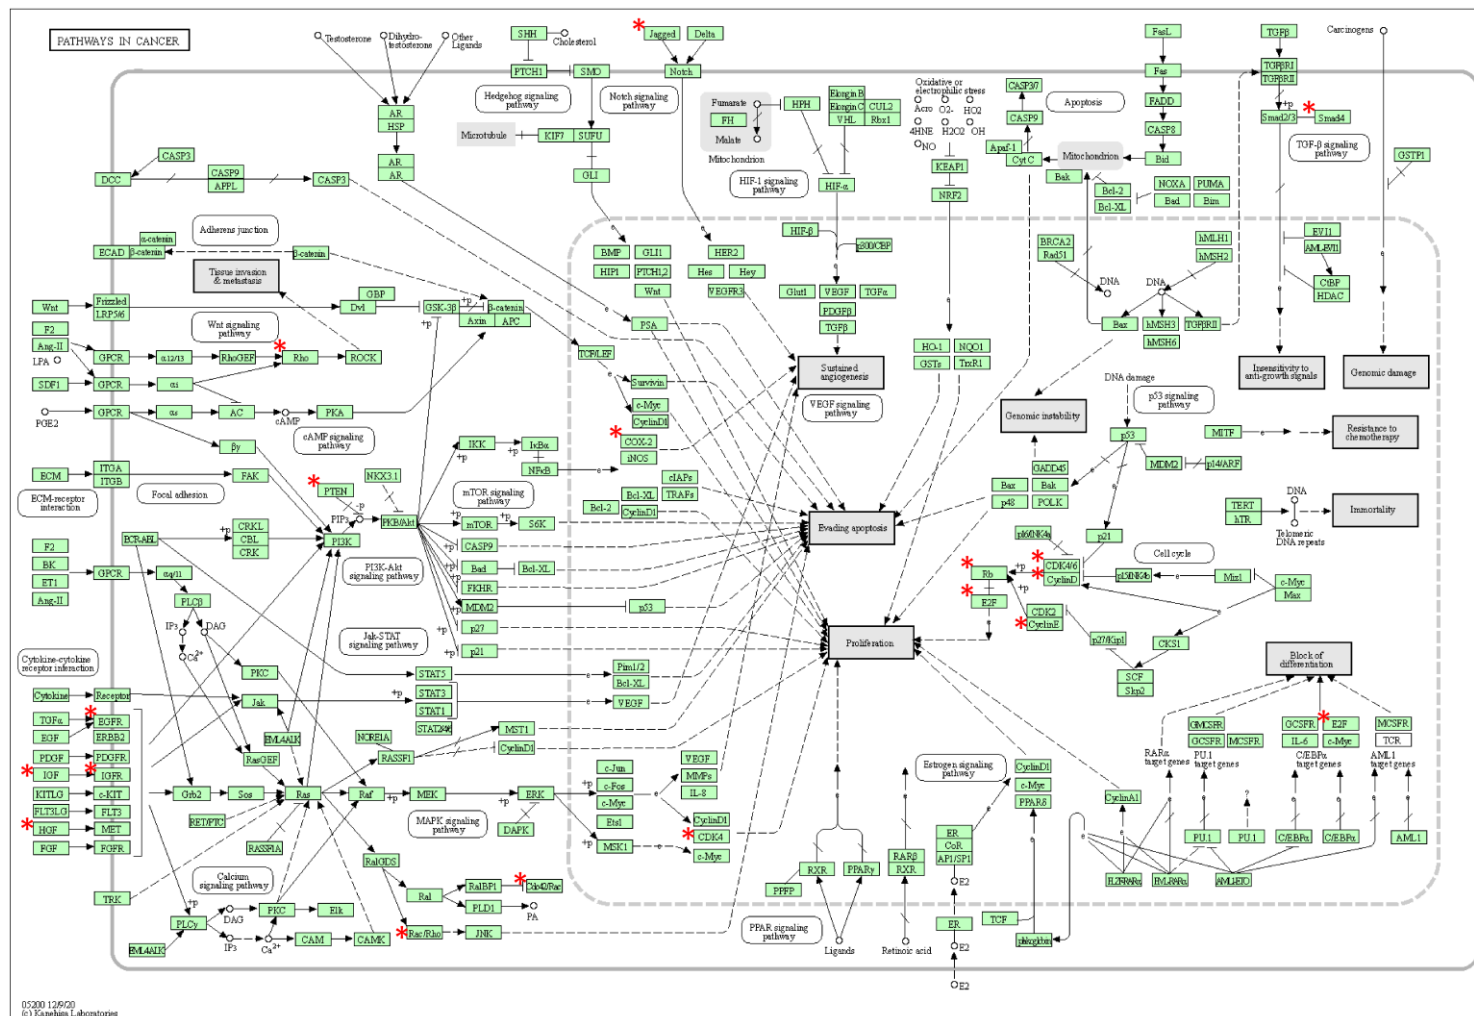

**Figure S1.** Implication of the strong experimentally validated shared target genes downstream of the CRC exosomal lncRNA/circRNA-miRNA-target axis in Pathways in Cancer KEGG pathway. 16 out of the 38 shared target genes were found to be implicated in Pathways in Cancer KEGG pathway. Red stars indicate the shared target genes.
